# Supplementary material
Source: publisher figshare collection journal article supplement (https://acs.figshare.com/ndownloader/files/4463011)
Supplement: Supplementary file 1 [file 4463011]

# Supporting Information For:

## **Stark Effects after Excited-State Interfacial Electron Transfer at Sensitized TiO<sub>2</sub> Nanocrystallites**

Shane Ardo<sup>1</sup>, Yali Sun<sup>2</sup>, Aaron Staniszewski<sup>1</sup>, Felix N. Castellano<sup>2\*</sup>, and Gerald J. Meyer<sup>1\*</sup>

<sup>1</sup>Departments of Chemistry and Materials Science and Engineering, Johns Hopkins University, 3400  
North Charles Street, Baltimore, Maryland 21218, USA

<sup>2</sup>Department of Chemistry and Center for Photochemical Sciences, Bowling Green State University,  
Bowling Green, Ohio 43403, USA

castell@bgnet.bgsu.edu; meyer@jhu.edu

**Figure S1** – (A) UV-Vis absorption spectra of  $[\text{Ru}(\text{dtb})_2(\text{dcb})]^{2+}$  anchored to  $\text{TiO}_2$  thin films in neat  $\text{CH}_3\text{CN}$  and after introduction of 100 mM  $\text{LiClO}_4$  highlighting the differences in the spectra,  $\lambda_{\text{max}}$ , and isosbestic points for the  $\text{Li}^+$ -induced spectral changes as a function of the indicated surface coverage. (B) Fraction growth of the spectroscopic changes monitored at 505 nm as a function of the concentration of  $\text{LiClO}_4$  in solution. Overlaid on the data are fits to the Langmuir isotherm model: a best fit (green) and a range of fits that bracket the spectroscopic data (orange) that result in the adduct formation constants shown.

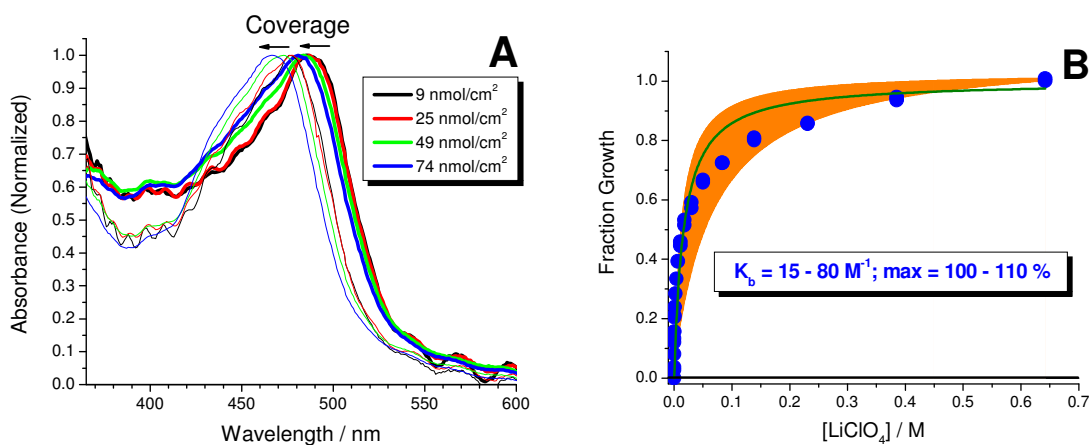

**Figure S2** – (A) UV-Vis absorption spectra of  $[\text{Ru}(\text{dtb})_2(\text{dcb})]^{2+}$  anchored to a  $\text{TiO}_2$  thin film in 500 mM  $\text{LiClO}_4/\text{CH}_3\text{CN}$  (black) and after four (orange; 31 mM), eight (violet; 2.0 mM), and ten (cyan; 0.49 mM  $\text{LiClO}_4$ ) 1:2 dilutions of the solution electrolyte. The spectra were converted from wavelength to wavenumber space by a well-known correction based on the change of variables theorem. The most dilute spectrum depicted was initially modeled as a sum of three Gaussians in energy in the  $18835 - 25582 \text{ cm}^{-1}$  ( $390.9 - 530.9 \text{ nm}$ ) range. The collective Gaussian fit is overlaid in pink and individual Gaussian components are shown in light green. (B) Difference absorption spectra with the same color scheme as in Panel A referenced to the most dilute spectrum (*i.e.*, cyan spectrum in panel A). Overlaid on the spectra at 500 mM  $\text{LiClO}_4$  (black) are spectral simulations using the difference between (a) the most dilute spectrum from Panel A and the same spectrum shifted  $220 \text{ cm}^{-1}$  (pink) and (b) the original and scaled & shifted ( $210 \text{ cm}^{-1}$ ) versions of the Gaussians from panel A (light green).

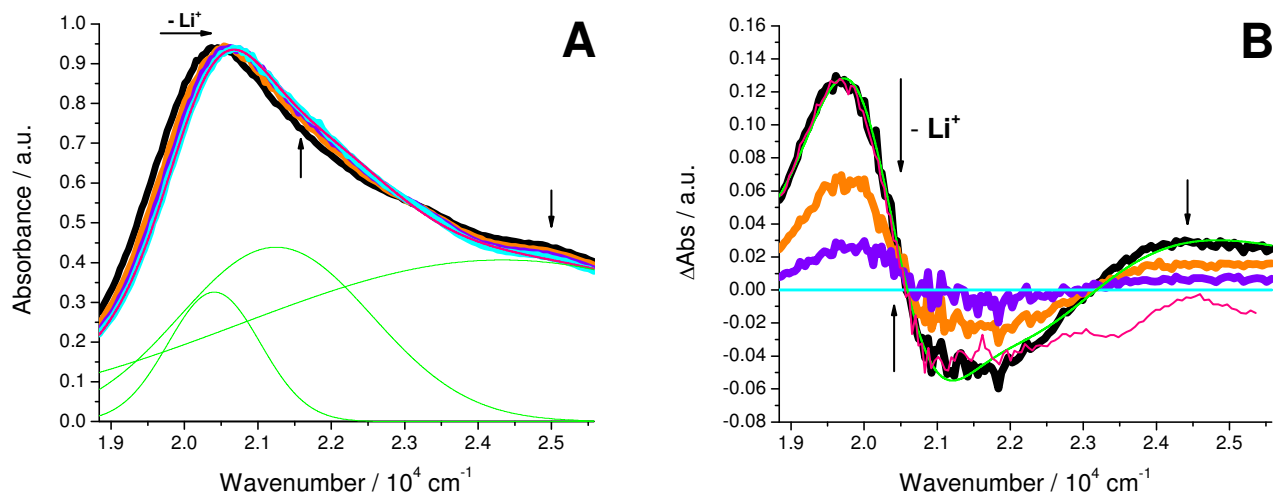

**Figure S3** – Extinction coefficient spectra of  $\text{TiO}_2(e^-)$ s and the sensitizers and oxidized donors required for spectral modeling in this study. Spectroelectrochemical reduction, chemical oxidation with  $\text{Br}_2$ , and  $\text{Li}^+$  titration were all employed in order to obtain these difference spectra.

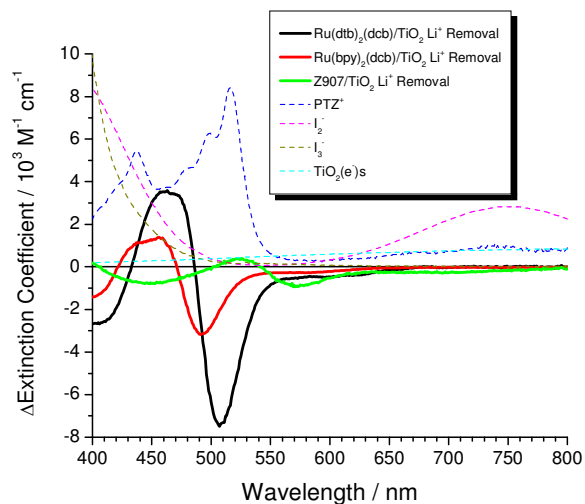

**Figure S4** – Absorption difference spectra at 510 nm after pulsed 532 nm excitation of a  $\text{Ru}(\text{dtb})_2(\text{dcb})/\text{TiO}_2$  thin film in 500 mM TBAI/ $\text{CH}_3\text{CN}$  with either 500 mM  $\text{LiClO}_4$  or 500 mM  $\text{Mg}(\text{ClO}_4)_2$ . Also shown is a representative  $\text{TiO}_2(e^-)$  spectrum at 750 nm, as both were within error the same.

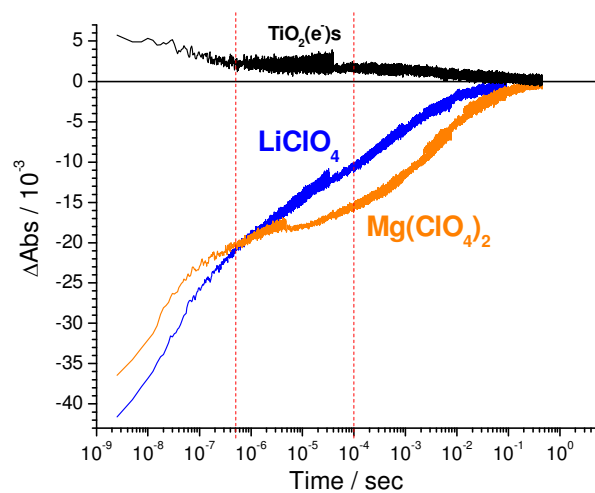

**Complete reference 7:** Kroon, J. M.; Bakker, N. J.; Smit, H. J. P.; Liska, P.; Thampi, K. R.; Wang, P.; Zakeeruddin, S. M.; Grätzel, M.; Hirsch, A.; Hore, S.; Würfel, U.; Sastrawan, R.; Durrant, J. R.; Palomares, E.; Pettersson, H.; Gruszecki, T.; Walter, J.; Skupien, K.; Tulloch, G. E. *Prog. Photovolt. Res. Appl.* **2007**, *15*, 1-18.
